# Supplementary material
Source: MDPI journal article supplement (https://www.mdpi.com/2039-4713/13/4/41)
Supplement: s1 [file s1]

**S1 Table. Chemical compositions of the essential oils of *Baccharis* species.**

| No. | RRI <sup>a</sup> | Compound name                   | Peak Area % <sup>b</sup> |                            |                      |                           |                        | ID     |
|-----|------------------|---------------------------------|--------------------------|----------------------------|----------------------|---------------------------|------------------------|--------|
|     |                  |                                 | <i>B. microdonta</i>     | <i>B. pauciflosculos a</i> | <i>B. punctulata</i> | <i>B. reticularioides</i> | <i>B. sphenophylla</i> |        |
| 1   | 922              | $\beta$ -Thujene                | -                        | 3.420                      | 0.412                | 0.889                     | 0.534                  | MS     |
| 2   | 928              | $\alpha$ -Pinene                | 0.753                    | 10.437                     | 3.548                | <b>24.477</b>             | <b>10.709</b>          | tr, MS |
| 3   | 943              | Camphene                        | -                        | 0.776                      | 0.186                | 0.431                     | 0.384                  | tr, MS |
| 4   | 947              | Thuja-2,4(10)-diene             | -                        | -                          | -                    | 2.911                     | 0.120                  | MS     |
| 5   | 967              | Sabinene                        | -                        | 2.745                      | 0.892                | 0.392                     | 3.809                  | tr, MS |
| 6   | 971              | $\beta$ -Pinene                 | 2.193                    | <b>18.317</b>              | 4.947                | 7.671                     | <b>15.197</b>          | tr, MS |
| 7   | 985              | Carveol                         | -                        | -                          | -                    | 0.669                     | -                      | tr, MS |
| 8   | 987              | $\beta$ -Myrcene                | -                        | 3.642                      | 0.297                | 0.273                     | 0.663                  | tr, MS |
| 9   | 1001             | p-Mentha-1,3,8-triene           | -                        | -                          | -                    | 0.573                     | -                      | MS     |
| 10  | 1002             | $\alpha$ -Phellandrene          | -                        | -                          | 0.325                | -                         | -                      | tr, MS |
| 11  | 1004             | 3-Carene                        | -                        | -                          | -                    | -                         | 0.986                  | tr, MS |
| 12  | 1013             | $\alpha$ -Terpinene             | -                        | 0.190                      | 0.104                | 0.428                     | 0.580                  | tr, MS |
| 13  | 1020             | p-Cymene                        | -                        | 0.818                      | 3.437                | 3.175                     | 1.309                  | tr, MS |
| 14  | 1024             | <b>Limonene</b>                 | 1.052                    | <b>18.751</b>              | 11.350               | 2.472                     | <b>14.488</b>          | tr, MS |
| 15  | 1043             | Ocimene                         | -                        | -                          | 0.251                | 0.140                     | -                      | MS     |
| 16  | 1053             | $\gamma$ -Terpinene             | -                        | 0.314                      | 0.162                | 0.698                     | 1.030                  | tr, MS |
| 17  | 1080             | Terpinolen                      | -                        | 0.136                      | -                    | 0.439                     | 0.371                  | tr, MS |
| 18  | 1085             | p-Cymenene                      | -                        | -                          | -                    | 0.848                     | 0.108                  | MS     |
| 19  | 1098             | Linalool                        | 0.141                    | 0.413                      | 0.309                | -                         | 0.151                  | tr, MS |
| 20  | 1112             | Thujone                         | -                        | -                          | -                    | 0.596                     | -                      | tr, MS |
| 21  | 1121             | $\alpha$ -Campholenal           | -                        | -                          | -                    | 1.627                     | -                      | MS     |
| 22  | 1131             | Nopinone                        | 0.121                    | -                          | -                    | 0.377                     | -                      | MS     |
| 23  | 1133             | <i>trans</i> -Pinocarveol       | 0.765                    | 0.413                      | 0.266                | 4.437                     | 0.788                  | tr, MS |
| 24  | 1140             | <i>trans</i> -Verbenol          | -                        | 0.103                      | 0.110                | 0.943                     | 0.112                  | MS     |
| 25  | 1145             | Unknown                         | -                        | -                          | -                    | 2.116                     | -                      | MS     |
| 26  | 1153             | 2-Norpinanone, 3,6,6-trimethyl- | -                        | -                          | -                    | 0.520                     | -                      | MS     |
| 27  | 1155             | Pinocarvone                     | 0.341                    | 0.260                      | 0.160                | 0.802                     | 0.268                  | tr, MS |
| 28  | 1167             | $\alpha$ -Phellandren-8-ol      | 0.148                    | -                          | -                    | 5.597                     | 0.149                  | MS     |
| 29  | 1174             | Terpinen-4-ol                   | -                        | 1.187                      | 0.466                | 1.340                     | 3.096                  | tr, MS |
| 30  | 1182             | p-Cymen-8-ol                    | -                        | 0.114                      | -                    | 0.833                     | 0.207                  | MS     |
| 31  | 1187             | Myrtenal                        | 0.620                    | 0.340                      | 0.240                | 2.135                     | 0.525                  | tr, MS |
| 32  | 1190             | $\alpha$ -Terpineol             | 1.008                    | 0.920                      | 0.420                | 4.817                     | 1.843                  | tr, MS |
| 33  | 1200             | Verbenone                       | -                        | -                          | -                    | 2.941                     | -                      | tr, MS |
| 34  | 1214             | <i>cis</i> -Carveol             | 0.151                    | 0.149                      | 0.274                | 1.186                     | 0.269                  | tr, MS |
| 35  | 1238             | Carvone                         | 0.181                    | 0.130                      | 0.415                | 0.430                     | 0.215                  | tr, MS |
| 36  | 1242             | 2-Caren-4-ol                    | -                        | -                          | -                    | 0.321                     | -                      | MS     |
| 37  | 1279             | Bornyl acetate                  | -                        | -                          | 1.317                | 0.596                     | 0.118                  | tr, MS |
| 38  | 1366             | $\alpha$ -Copaene               | 0.272                    | 0.222                      | -                    | -                         | 0.258                  | MS     |
| 39  | 1379             | $\beta$ -Cubebene               | -                        | 0.335                      | -                    | -                         | 0.133                  | MS     |
| 40  | 1381             | $\beta$ -Elemen                 | 0.932                    | 0.412                      | 0.666                | -                         | 0.234                  | MS     |
| 41  | 1401             | $\beta$ -Caryophyllen           | 1.029                    | 1.797                      | 3.346                | -                         | 3.598                  | tr, MS |
| 42  | 1409             | $\alpha$ -Humulene              | 0.445                    | 0.189                      | 0.419                | -                         | 0.311                  | tr, MS |
| 43  | 1410             | Alloaromadendrene               | 0.170                    | 0.525                      | 0.154                | 0.176                     | 0.266                  | MS     |
| 44  | 1413             | $\delta$ -Cadinene              | 0.362                    | 0.123                      | -                    | -                         | 0.103                  | MS     |
| 45  | 1414             | $\gamma$ -Muurolene             | 0.151                    | 0.262                      | 0.168                | -                         | 0.268                  | MS     |
| 46  | 1414             | $\alpha$ -Gurjunene             | -                        | -                          | 0.422                | -                         | -                      | MS     |
| 47  | 1415             | $\beta$ -Copaene                | 0.611                    | 2.554                      | 3.626                | -                         | 1.441                  | MS     |
| 48  | 1416             | $\beta$ -Guaiene                | 1.430                    | 0.154                      | 0.120                | 0.152                     | 0.242                  | MS     |
| 49  | 1417             | Ledene                          | 0.227                    | 0.293                      | 0.130                | -                         | 0.174                  | tr, MS |

|    |      |                                                                                                      |               |       |       |       |               |        |
|----|------|------------------------------------------------------------------------------------------------------|---------------|-------|-------|-------|---------------|--------|
| 50 | 1418 | Bicyclogermacrene                                                                                    | -             | 1.249 | 3.099 | -     | 0.475         | MS     |
| 51 | 1418 | $\alpha$ -Selinene                                                                                   | 0.620         | -     | -     | -     | -             | MS     |
| 52 | 1419 | $\alpha$ -Muurolene                                                                                  | 0.125         | 0.626 | 0.262 | -     | 0.285         | MS     |
| 53 | 1422 | $\beta$ -Bisabolene                                                                                  | -             | -     | 1.183 | -     | -             | MS     |
| 54 | 1422 | $\gamma$ -Cadinene                                                                                   | 0.116         | 0.391 | -     | 0.561 | 0.513         | MS     |
| 55 | 1423 | $\beta$ -Cadinene                                                                                    | 0.964         | 2.739 | 1.133 | 0.276 | 0.785         | MS     |
| 56 | 1424 | <i>cis</i> -Calamenene                                                                               | 0.166         | 0.294 | -     | -     | -             | MS     |
| 57 | 1428 | $\alpha$ -Calacorene                                                                                 | 0.790         | -     | -     | 0.402 | 0.184         | MS     |
| 58 | 1430 | Unknown                                                                                              | 0.265         | -     | 0.224 | -     | 0.207         | MS     |
| 59 | 1431 | 2-Butenal, 2-methyl-4-(2,6,6-trimethyl-1-cyclohexen-1-yl)-                                           | 0.379         | -     | -     | -     | -             | MS     |
| 60 | 1431 | Elemol                                                                                               | -             | 0.168 | 1.018 | -     | -             | MS     |
| 61 | 1433 | (1R,7S,E)-7-Isopropyl-4,10-dimethylenecyclodec-5-enol                                                | 0.832         | -     | -     | 0.333 | 0.343         | MS     |
| 62 | 1436 | Palustrol                                                                                            | 3.336         | -     | 0.126 | -     | -             | MS     |
| 63 | 1438 | <b>Spathulenol</b>                                                                                   | <b>23.274</b> | 9.520 | 9.962 | 5.519 | <b>13.112</b> | tr, MS |
| 64 | 1439 | Caryophyllene oxide                                                                                  | 5.401         | 2.111 | 5.301 | 1.373 | 5.323         | tr, MS |
| 65 | 1440 | Unknown                                                                                              | 0.591         | -     | -     | -     | 0.354         | MS     |
| 66 | 1442 | Aristolene epoxide                                                                                   | 0.144         | 0.201 | 0.142 | 0.127 | 0.257         | MS     |
| 67 | 1443 | Viridiflorol                                                                                         | 3.850         | 1.804 | 0.174 | -     | 1.654         | tr, MS |
| 68 | 1446 | Ledol                                                                                                | 2.819         | -     | -     | -     | 0.102         | MS     |
| 69 | 1448 | Calarene epoxide                                                                                     | 1.545         | 0.166 | 0.428 | 0.512 | 0.409         | MS     |
| 70 | 1451 | Unknown                                                                                              | 1.491         | -     | -     | -     | 0.366         | MS     |
| 71 | 1455 | Cubenol                                                                                              | 1.027         | 0.375 | -     | 0.142 | 0.170         | MS     |
| 72 | 1456 | Isospathulenol                                                                                       | -             | -     | 1.087 | -     | -             | MS     |
| 73 | 1457 | $\gamma$ -Himachalene                                                                                | -             | 0.147 | 0.380 | -     | 0.237         | MS     |
| 74 | 1457 | Unknown                                                                                              | 1.370         | -     | -     | -     | -             | MS     |
| 75 | 1458 | $\delta$ -Cadinol                                                                                    | 0.445         | -     | 1.946 | 0.109 | 0.145         | MS     |
| 76 | 1460 | $\tau$ -Cadinol                                                                                      | 0.419         | 0.767 | 0.261 | 2.640 | 2.264         | MS     |
| 77 | 1461 | <i>epi</i> - $\alpha$ -Muurolol                                                                      | 0.178         | 0.651 | 0.272 | -     | -             | MS     |
| 78 | 1462 | Alloaromadendrene oxide                                                                              | 0.874         | -     | -     | -     | -             | MS     |
| 79 | 1464 | $\beta$ -Eudesmol                                                                                    | -             | -     | 0.640 | -     | -             | tr, MS |
| 80 | 1464 | $\alpha$ -Bisabolol oxide B                                                                          | -             | -     | 1.168 | -     | -             | MS     |
| 81 | 1464 | $\alpha$ -Cadinol                                                                                    | -             | 1.438 | -     | 1.361 | 1.481         | MS     |
| 82 | 1465 | <b>Kongol</b>                                                                                        | <b>22.434</b> | -     | -     | -     | -             | tr, MS |
| 83 | 1467 | 4H-Naphth[1,2-b]oxireno[c]furan, 2,2a,5,5a,6,7,8,9b-octahydro-2a,5a,9-trimethyl-, (2aS,3aR,5aS,9bR)- | -             | -     | 1.338 | -     | -             | MS     |
| 84 | 1467 | Murolan-3,9(11)-diene-10-peroxy                                                                      | 0.400         | -     | -     | -     | -             | MS     |
| 85 | 1469 | Isoaromadendrene epoxide                                                                             | 3.046         | 0.207 | 0.488 | 0.461 | 0.766         | MS     |
| 86 | 1473 | Unknown                                                                                              | 0.579         | -     | -     | -     | -             | MS     |

|                               |      |                                                                       |        |        |               |        |        |        |
|-------------------------------|------|-----------------------------------------------------------------------|--------|--------|---------------|--------|--------|--------|
| 87                            | 1474 | (1R,7S,E)-7-Isopropyl-4,10-dimethylenecyclodec-5-enol                 | 0.770  | 0.389  | -             | 0.146  | 0.424  | MS     |
| 88                            | 1475 | $\alpha$ -Bisabolol                                                   | -      | -      | <b>23.633</b> | -      | -      | tr, MS |
| 89                            | 1480 | 6-Isopropenyl-4,8a-dimethyl-1,2,3,5,6,7,8,8a-octahydronaphthalen-2-ol | 0.688  | -      | -             | -      | -      | MS     |
| 90                            | 1483 | Unknown                                                               | 0.664  | -      | -             | -      | -      | MS     |
| 91                            | 1484 | Ylangenal                                                             | 0.764  | -      | -             | -      | -      | MS     |
| 92                            | 1485 | 1,3-di-isopropynaphthalene                                            | -      | -      | 0.434         | -      | -      | MS     |
| 93                            | 1489 | Aromadendrene oxide                                                   | 0.306  | -      | -             | -      | -      | MS     |
| 94                            | 1493 | Murolan-3,9(11)-diene-10-peroxy                                       | 0.356  | -      | 0.103         | -      | -      | MS     |
| Compounds identified (%)      |      |                                                                       | 94.131 | 93.684 | 93.741        | 92.39  | 94.913 |        |
| Monoterpenoids hydrocarbons   |      |                                                                       | 7.530  | 22.484 | 22.567        | 28.283 | 25.423 |        |
| Oxygenated monoterpenoids     |      |                                                                       | 15.061 | 16.863 | 15.624        | 33.939 | 18.644 |        |
| Sesquiterpenoids hydrocarbons |      |                                                                       | 30.122 | 31.852 | 22.567        | 9.427  | 27.118 |        |
| Oxygenated sesquiterpenoids   |      |                                                                       | 41.418 | 22.484 | 31.247        | 20.741 | 23.728 |        |
| Others                        |      |                                                                       | -      | -      | 1.736         | -      | -      |        |

RRI: relative retention indices; RRI a, relative retention indices calculated against n-alkanes on the DB-5MS column; RI lit b, retention index literature (DB-5 column) [70]; RRI c, relative retention indices calculated against n-alkanes on the DB-WAX column; RI lit d, retention index literature (CW20M column) [71], Peak Area% e; stereoisomers not identified f; NC, non-polar column; PC, polar column, tr, identification based on the retention times (tr) of genuine compounds on the DB-5MS column; MS, identified on the basis of computer matching of the mass spectra with those of the Wiley and NIST libraries and comparison with literature data. The compounds in bold represent the major compounds.

**Note:** This table was previously published as part of the paper: Budel JM, Wang M, Raman V, Zhao J, Khan SI, Rehman JU, Techen N, Tekwani B, Monteiro LM, Heiden G, Takeda IJM, Farago PV, Khan IA. Essential oils of five *Baccharis* species: investigations on the chemical composition and biological activities. *Molecules*. 2018 Oct 12;23(10):2620. doi: 10.3390/molecules23102620.

#### Supplementary references:

70. Adams, R. P., *Identification of Essential Oil Components by Gas Chromatography/Mass Spectrometry*, 4th ed.; Allured Publishing Corporation: Carol Stream, IL, USA, 2007; ISBN 978-1-932633-21-4. Supplementary reference
71. Davies, N., Gas chromatographic retention indices of monoterpenes and sesquiterpenes on methyl silicon and Carbowax 20M phases. *J. Chromatogr. A*. **1990**, 503, 1–24. doi: 10.1016/S0021-9673(01)81487-4. Supplementary reference
